# Supplementary material for: Insight into an unusual lanthanum effect on the oxygen reduction reaction activity of Ruddlesden-Popper-type cation-nonstoichiometric La2−xNiO4+δ (x = 0–0.1) oxides
Source: Royal Society of Chemistry journal article supplement (doi:10.1039/c4ta07176j), 2015-01-01
Supplement: c4ta07176j1.pdf [file c4ta07176j1.pdf]

**Insight into an unusual lanthanum effect on the oxygen reduction  
reaction activity of Ruddlesden-Popper-type cation-  
nonstoichiometric  $\text{La}_{2-x}\text{NiO}_{4+\delta}$  ( $x=0\sim 0.1$ ) oxides**

Yubo Chen,<sup>a</sup> Baoming Qian,<sup>a</sup> Guangming Yang,<sup>a</sup> Dengjie Chen<sup>b</sup> and Zongping Shao<sup>a,c</sup>

<sup>a</sup> *State Key Laboratory of Materials-Oriented Chemical Engineering, College of Chemistry & Chemical Engineering, Nanjing Tech University, Nanjing 210009, China*

<sup>b</sup> *Department of Mechanical and Aerospace Engineering, The Hong Kong University of Science and Technology, Hong Kong, SAR China.*

<sup>c</sup> *College of Energy, Nanjing Tech University, Nanjing 210009, China*

**Table S1** The interplanar spaces measured from the diffraction data and the values calculated from the Rietveld refinement of X-ray diffraction.

| zone axis | [001] |      |      | [121] |      |      | [141] |      |      |
|-----------|-------|------|------|-------|------|------|-------|------|------|
|           | (20)  | (20) | (00) | (11)  | (04) | (3)  | (13)  | (5)  | (02) |
| Mea.(Å)*  | 2.70  | 1.92 | 2.75 | 3.65  | 2.04 | 2.78 | 2.82  | 2.12 | 2.49 |
| Cal.(Å)** | 2.69  | 1.91 | 2.71 | 3.70  | 2.07 | 2.85 | 2.85  | 2.12 | 2.51 |

\* Measured interplanar spaces from the diffraction data.

\*\* Calculated from the Rietveld refinement of X-ray diffractions.

**Table S2** The fitting data of the La-deficient  $\text{La}_{2-x}\text{NiO}_{4+\delta}$  samples.

|                                         | Temperature(°C)              | 750      | 700      | 650      | 600      | 550       | 500      |
|-----------------------------------------|------------------------------|----------|----------|----------|----------|-----------|----------|
| $\text{La}_{1.98}\text{NiO}_{4+\delta}$ |                              |          |          |          |          |           |          |
| Arc1                                    | R1 ( $\Omega \text{ cm}^2$ ) | /        | /        | /        | 0.595    | 1.402     | 3.6109   |
|                                         | C1 ( $\text{F cm}^{-2}$ )    | /        | /        | /        | 1.511E-9 | 1.2266E-9 | 3.289E-9 |
|                                         | f1 (Hz)                      | /        | /        | /        | 1.772E8  | 9.263E7   | 1.341E7  |
| Arc2                                    | R2 ( $\Omega \text{ cm}^2$ ) | 0.3208   | 0.6384   | 1.4834   | 4.609    | 11.211    | 31.922   |
|                                         | C2 ( $\text{F cm}^{-2}$ )    | 4.798E-5 | 2.654E-5 | 2.446E-5 | 4.29E-5  | 3.138E-5  | 2.346E-5 |
|                                         | f2 (Hz)                      | 10346.3  | 9396.9   | 4388.3   | 805.3    | 452.6     | 212.62   |
| Arc3                                    | R3 ( $\Omega \text{ cm}^2$ ) | 0.423    | 0.9323   | 2.153    | 4.5407   | 13.567    | 46.80    |
|                                         | C3 ( $\text{F cm}^{-2}$ )    | 0.001893 | 0.00183  | 0.002139 | 0.004706 | 0.004675  | 0.00494  |
|                                         | f3 (Hz)                      | 198.79   | 93.29    | 34.576   | 7.4528   | 2.5106    | 0.6886   |
| $\text{La}_{1.95}\text{NiO}_{4+\delta}$ |                              |          |          |          |          |           |          |
| Arc1                                    | R1 ( $\Omega \text{ cm}^2$ ) | /        | /        | /        | 0.5492   | 1.649     | 4.563    |
|                                         | C1 ( $\text{F cm}^{-2}$ )    | /        | /        | /        | 5.587E-8 | 4.802E-9  | 5.681E-9 |
|                                         | f1 (Hz)                      | /        | /        | /        | 5.190E6  | 2.011E7   | 6.143E6  |

|                                           |                              |          |          |          |          |           |          |
|-------------------------------------------|------------------------------|----------|----------|----------|----------|-----------|----------|
| Arc2                                      | R2 ( $\Omega \text{ cm}^2$ ) | 0.5823   | 0.7398   | 2.817    | 7.506    | 20.528    | 44.59    |
|                                           | C2 ( $\text{F cm}^{-2}$ )    | 3.406E-5 | 1.133E-5 | 1.619E-5 | 1.812E-5 | 1.619E-5  | 9.14E-5  |
|                                           | f2 (Hz)                      | 8029.5   | 19000.4  | 3491.1   | 1170.8   | 479.1     | 390.66   |
| Arc3                                      | R3 ( $\Omega \text{ cm}^2$ ) | 0.42051  | 1.443    | 2.1991   | 4.861    | 13.136    | 60.74    |
|                                           | C3 ( $\text{F cm}^{-2}$ )    | 0.00246  | 0.000807 | 0.003078 | 0.00591  | 0.00846   | 0.004765 |
|                                           | f3 (Hz)                      | 153.7    | 136.77   | 23.53    | 5.54     | 1.432     | 0.5502   |
| <b>La<sub>1.90</sub>NiO<sub>4+δ</sub></b> |                              |          |          |          |          |           |          |
| Arc1                                      | R1 ( $\Omega \text{ cm}^2$ ) | /        | /        | /        | 0.6327   | 1.90014   | 5.0037   |
|                                           | C1 ( $\text{F cm}^{-2}$ )    | /        | /        | /        | 1.913E-8 | 3.0379E-9 | 3.929E-9 |
|                                           | f1 (Hz)                      | /        | /        | /        | 1.316E7  | 2.759E7   | 8.101E6  |
| Arc2                                      | R2 ( $\Omega \text{ cm}^2$ ) | 0.7689   | 1.05268  | 3.0865   | 9.197    | 21.95     | 44.964   |
|                                           | C2 ( $\text{F cm}^{-2}$ )    | 2.844E-5 | 1.209E-5 | 1.591E-5 | 2.004E-5 | 1.4839E-5 | 1.176E-5 |
|                                           | f2 (Hz)                      | 7282.3   | 12505.56 | 3243.3   | 864.22   | 489.00    | 301.2    |
| Arc3                                      | R3 ( $\Omega \text{ cm}^2$ ) | 0.2809   | 1.2357   | 2.252    | 3.795    | 15.353    | 63.781   |
|                                           | C3 ( $\text{F cm}^{-2}$ )    | 0.005022 | 0.00102  | 0.002503 | 0.007577 | 0.005788  | 0.003435 |
|                                           | f3 (Hz)                      | 112.887  | 126.3    | 28.252   | 5.5386   | 1.7921    | 0.7269   |

**Table S3** the fitting parameters of La<sub>2</sub>NiO<sub>4+δ</sub> at different oxygen partial pressures (0.05~0.4atm).

| P <sub>O2</sub> (atm) |      | 0.05                         | 0.1       | 0.2        | 0.4        |           |
|-----------------------|------|------------------------------|-----------|------------|------------|-----------|
| 550 °C                | Arc1 | R1 ( $\Omega \text{ cm}^2$ ) | 1.768     | 1.768      | 1.768      | 1.768     |
|                       |      | C1 ( $\text{F cm}^{-2}$ )    | 1.089E-10 | 7.40E-11   | 8.383E-11  | 1.113E-10 |
|                       |      | f1 (Hz)                      | 796408674 | 1171489589 | 1034262424 | 964402905 |
|                       | Arc2 | R2 ( $\Omega \text{ cm}^2$ ) | 12.462    | 11.4801    | 9.803      | 10.623    |
|                       |      | C2 ( $\text{F cm}^{-2}$ )    | 4.729E-5  | 4.520E-5   | 4.949E-5   | 1.859E-5  |
|                       |      | f2 (Hz)                      | 260.11    | 295.4      | 315.94     | 806.0     |
|                       | Arc3 | R3 ( $\Omega \text{ cm}^2$ ) | 24.24     | 16.735     | 11.97      | 13.26     |
|                       |      | C3 ( $\text{F cm}^{-2}$ )    | 0.004858  | 0.00536    | 0.005788   | 0.00757   |

---

|        |      |                              |          |          |           |          |
|--------|------|------------------------------|----------|----------|-----------|----------|
|        |      | f3 (Hz)                      | 1.3017   | 1.7075   | 2.213     | 1.585    |
| 600 °C | Arc1 | R1 ( $\Omega \text{ cm}^2$ ) | 5.328    | 4.358    | 3.678     | 2.8173   |
|        |      | C1 ( $\text{F cm}^{-2}$ )    | 5.544E-5 | 5.640E-5 | 3.9696E-5 | 5.425E-5 |
|        |      | f1 (Hz)                      | 518.99   | 623.62   | 1050.04   | 1002.87  |
|        | Arc2 | R2 ( $\Omega \text{ cm}^2$ ) | 8.596    | 6.231    | 4.513     | 3.4611   |
|        |      | C2 ( $\text{F cm}^{-2}$ )    | 0.00484  | 0.00475  | 0.00452   | 0.00428  |
|        |      | f2 (Hz)                      | 3.682    | 5.182    | 7.507     | 10.347   |
| 650 °C | Arc1 | R1 ( $\Omega \text{ cm}^2$ ) | 2.376    | 1.7217   | 1.476     | 1.1584   |
|        |      | C1 ( $\text{F cm}^{-2}$ )    | 5.989E-5 | 7.476E-5 | 6.37E-5   | 6.029E-5 |
|        |      | f1 (Hz)                      | 1077.2   | 1190.85  | 1630.89   | 2194.7   |
|        | Arc2 | R2 ( $\Omega \text{ cm}^2$ ) | 3.3537   | 2.594    | 1.828     | 1.373    |
|        |      | C2 ( $\text{F cm}^{-2}$ )    | 0.005033 | 0.003803 | 0.00387   | 0.00378  |
|        |      | f2 (Hz)                      | 9.0817   | 15.537   | 21.679    | 29.517   |
| 700 °C | Arc1 | R1 ( $\Omega \text{ cm}^2$ ) | 0.9182   | 0.729    | 0.515     | 0.463    |
|        |      | C1 ( $\text{F cm}^{-2}$ )    | 8.49E-5  | 8.65E-5  | 7.0987E-5 | 8.493E-5 |
|        |      | f1 (Hz)                      | 1966.187 | 2431.77  | 4194.8    | 3898.4   |
|        | Arc2 | R2 ( $\Omega \text{ cm}^2$ ) | 1.5571   | 1.127    | 0.897     | 0.6152   |
|        |      | C2 ( $\text{F cm}^{-2}$ )    | 0.00384  | 0.003396 | 0.00247   | 0.00293  |
|        |      | f2 (Hz)                      | 25.62    | 40.042   | 69.056    | 84.943   |

---

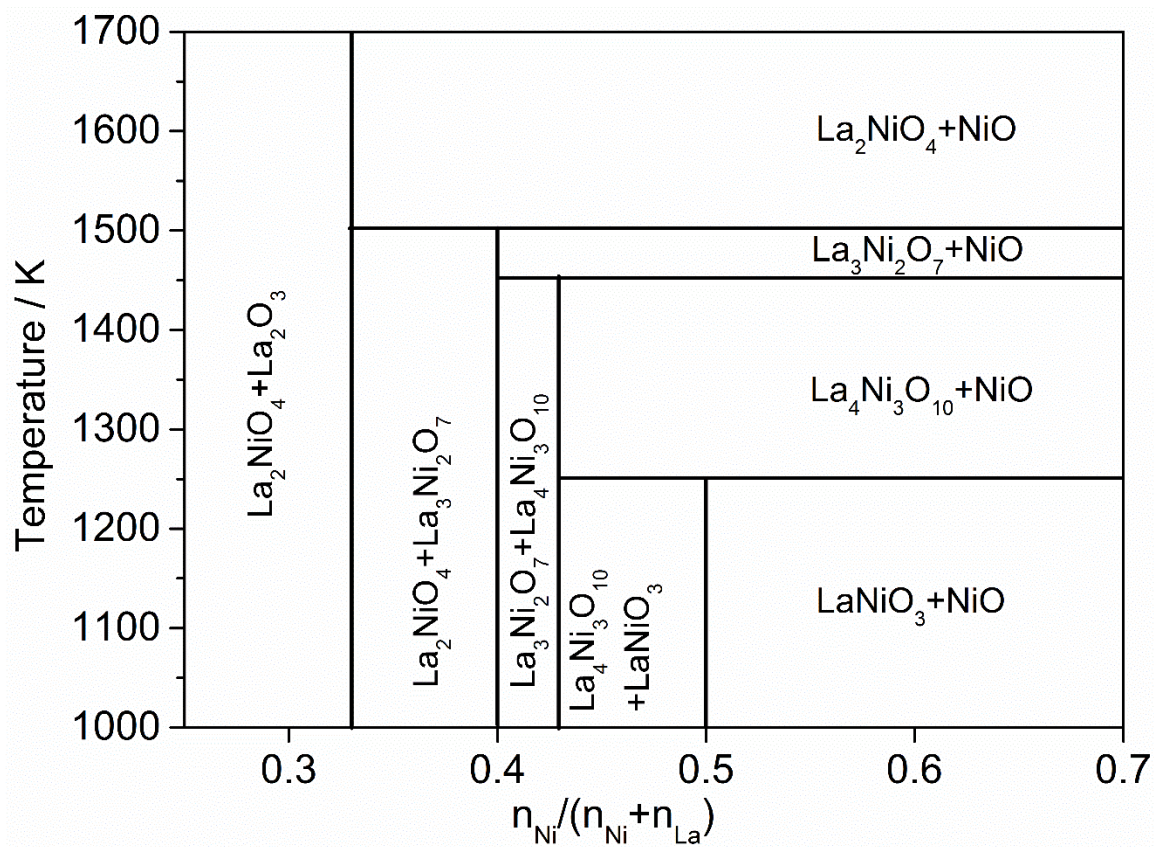

**Figure S1** A thermodynamic calculation of stable phase composition of the ternary La-Ni-O system.

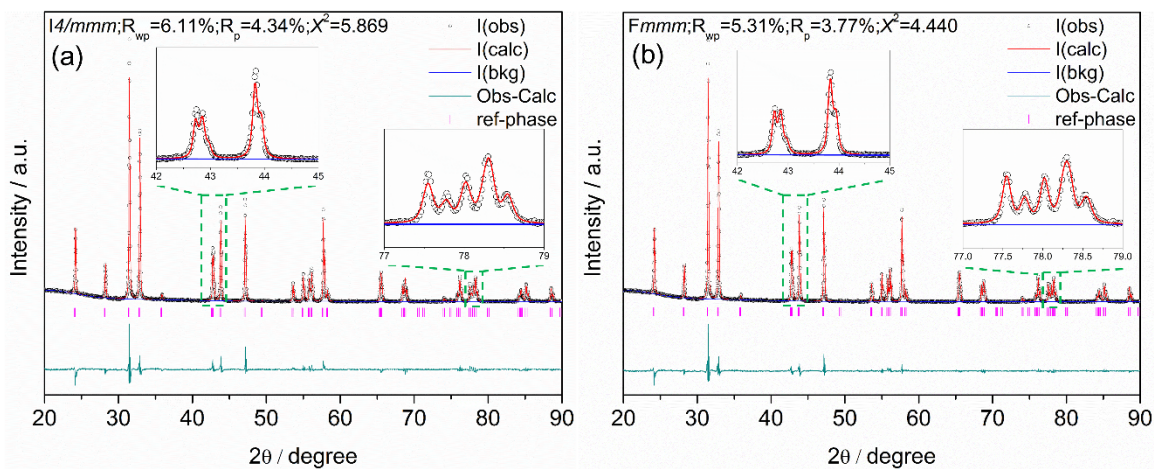

**Figure S2** Refined diffraction patterns of  $\text{La}_2\text{NiO}_{4+\delta}$  phase.

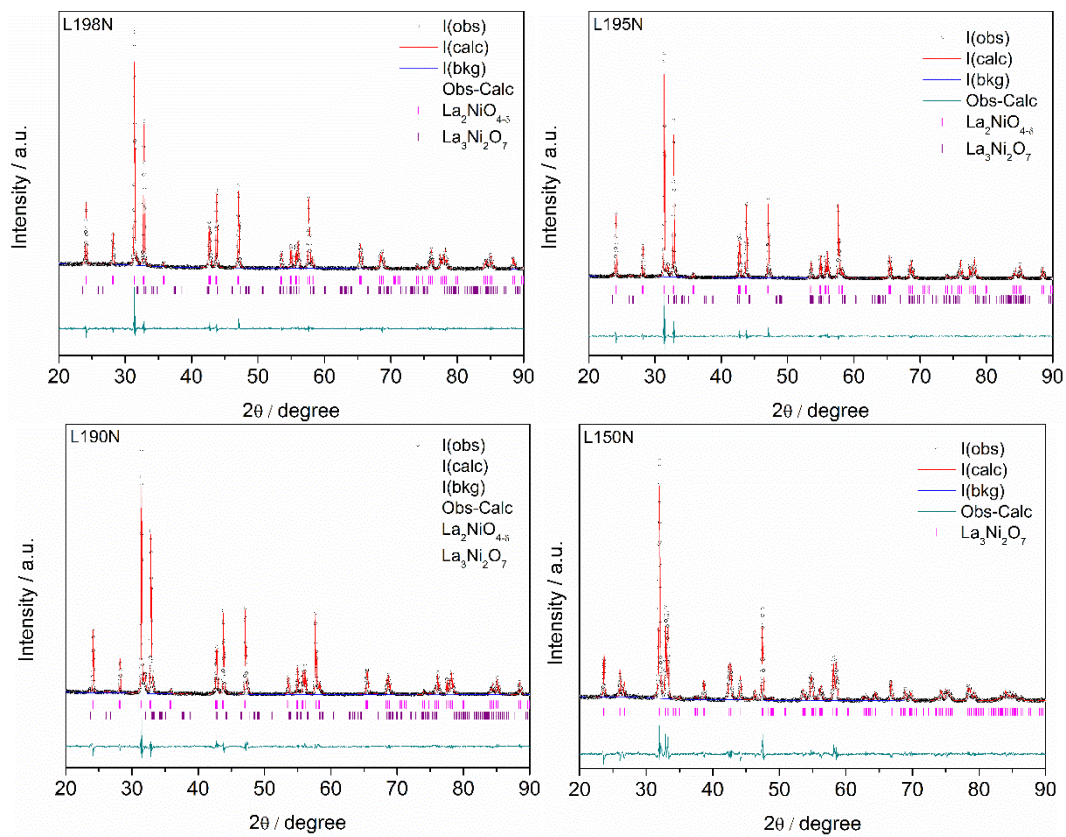

Figure S3 The refined diffraction patterns of the La-deficient  $\text{La}_{2-x}\text{NiO}_{4+\delta}$  phases.

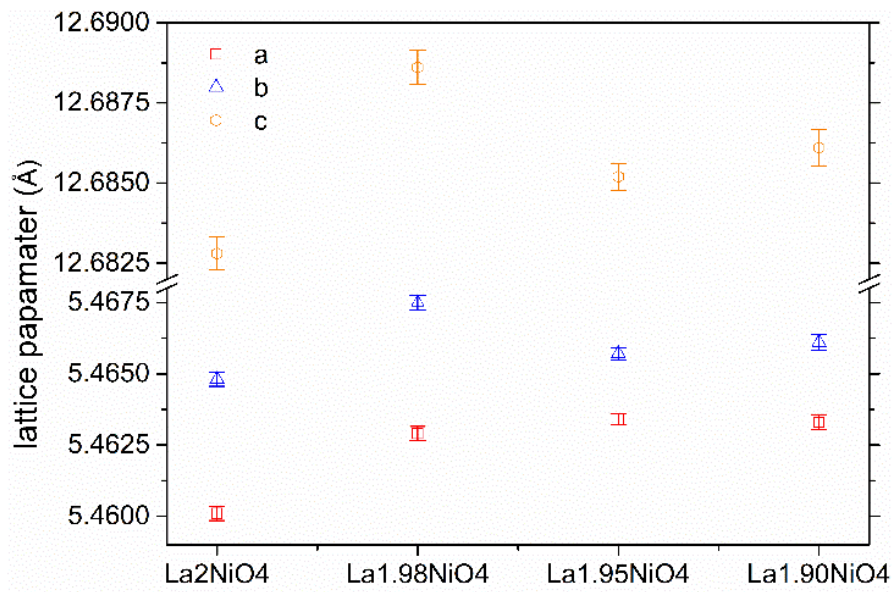

**Figure S4** Variation of lattice parameters (a, b and c) of primary  $\text{La}_2\text{NiO}_{4+\delta}$  phase in samples.

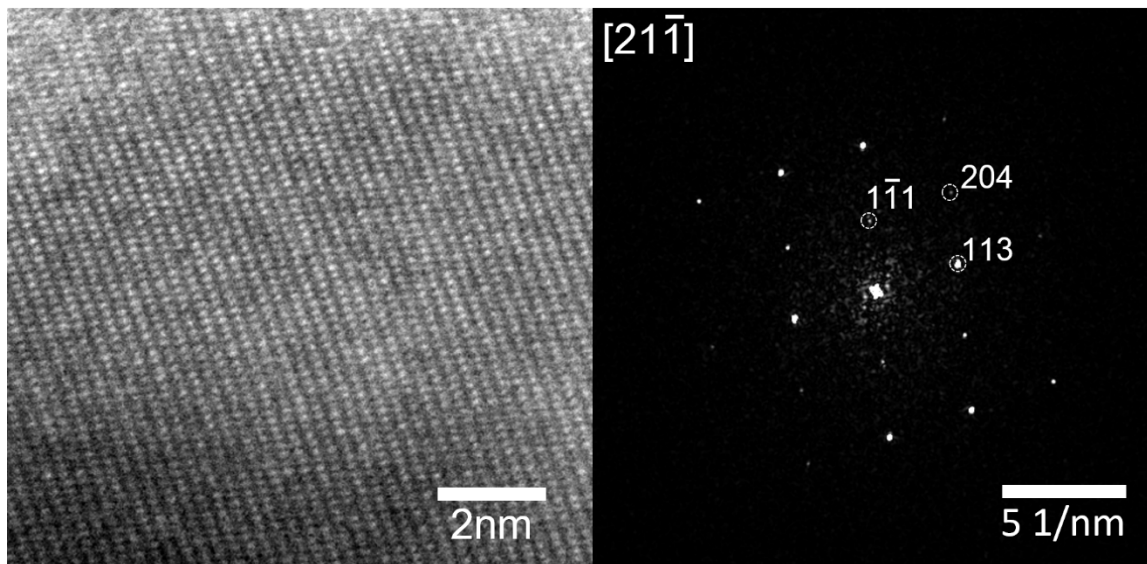

**Figure S5** HRTEM image of a  $\text{La}_{2-x}\text{NiO}_{4+\delta}$  sample (a) and the corresponding diffraction patterns acquired via FFT (b).

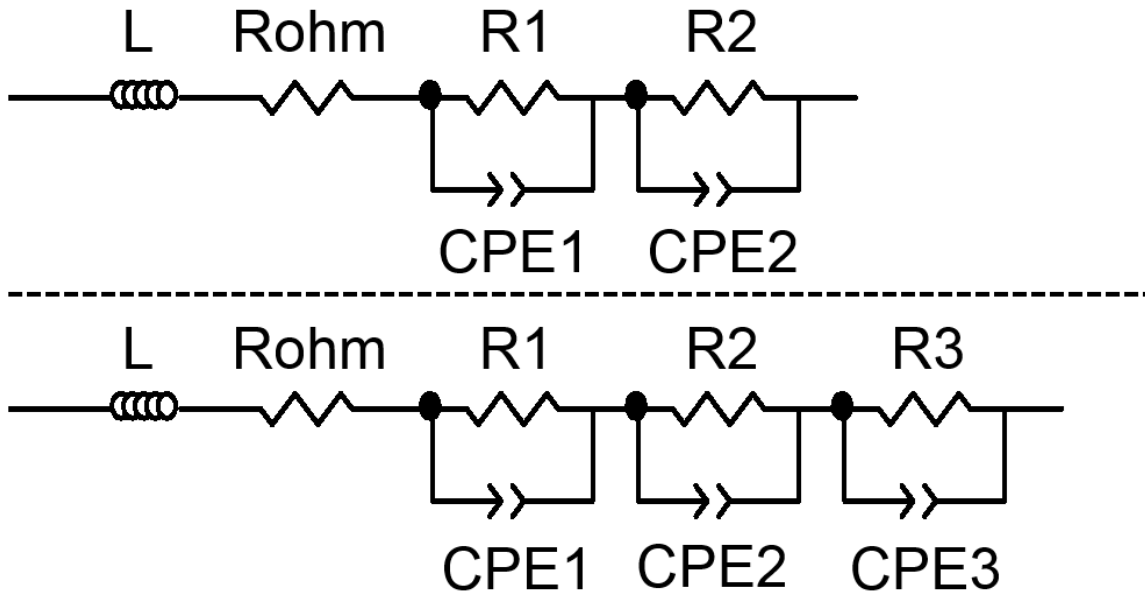

**Figure S6** The equivalent circuit of the type  $L-R_o-(R1||CPE1)-(R2||CPE2)-\dots-(R_i||CPE_i)$ .



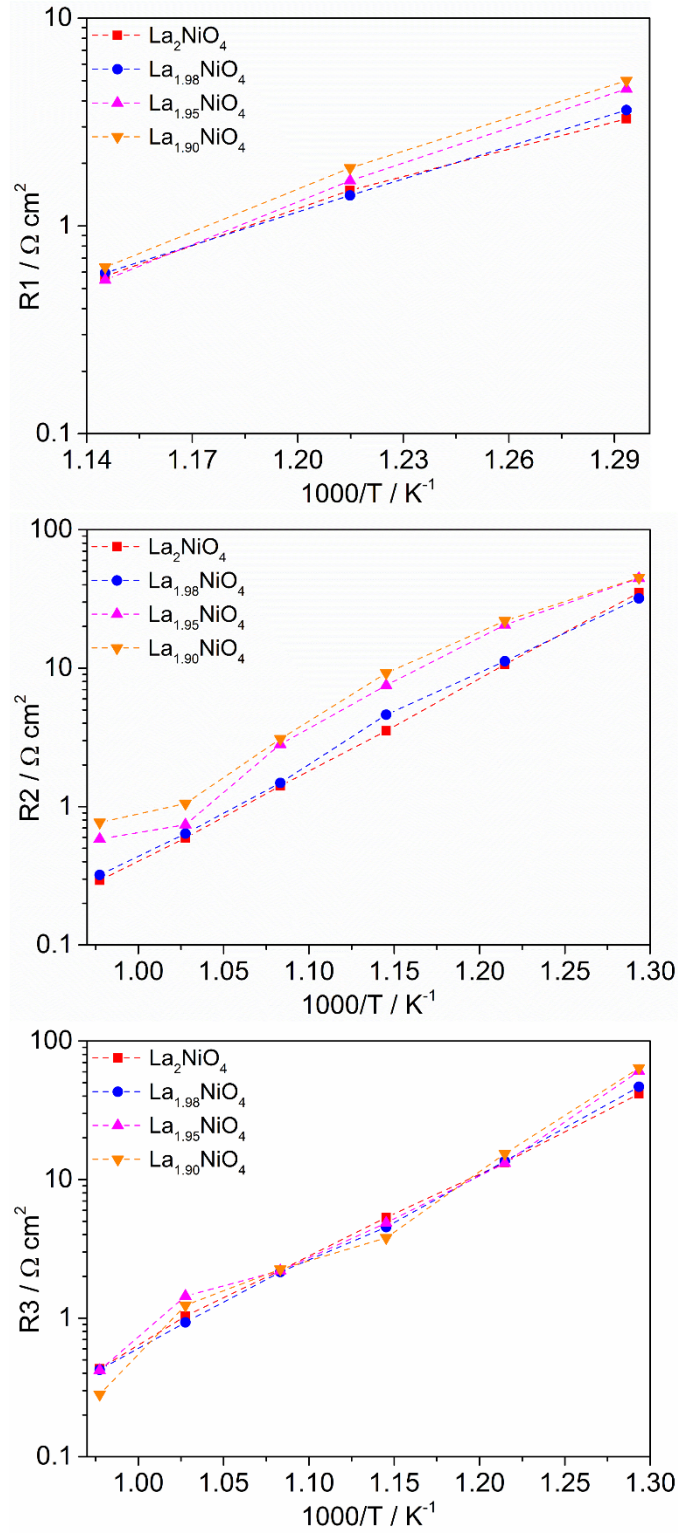

**Figure S7** The resistances belonging to three arcs from the spectra at high (R1), medium (R2) and low (R3) frequency.

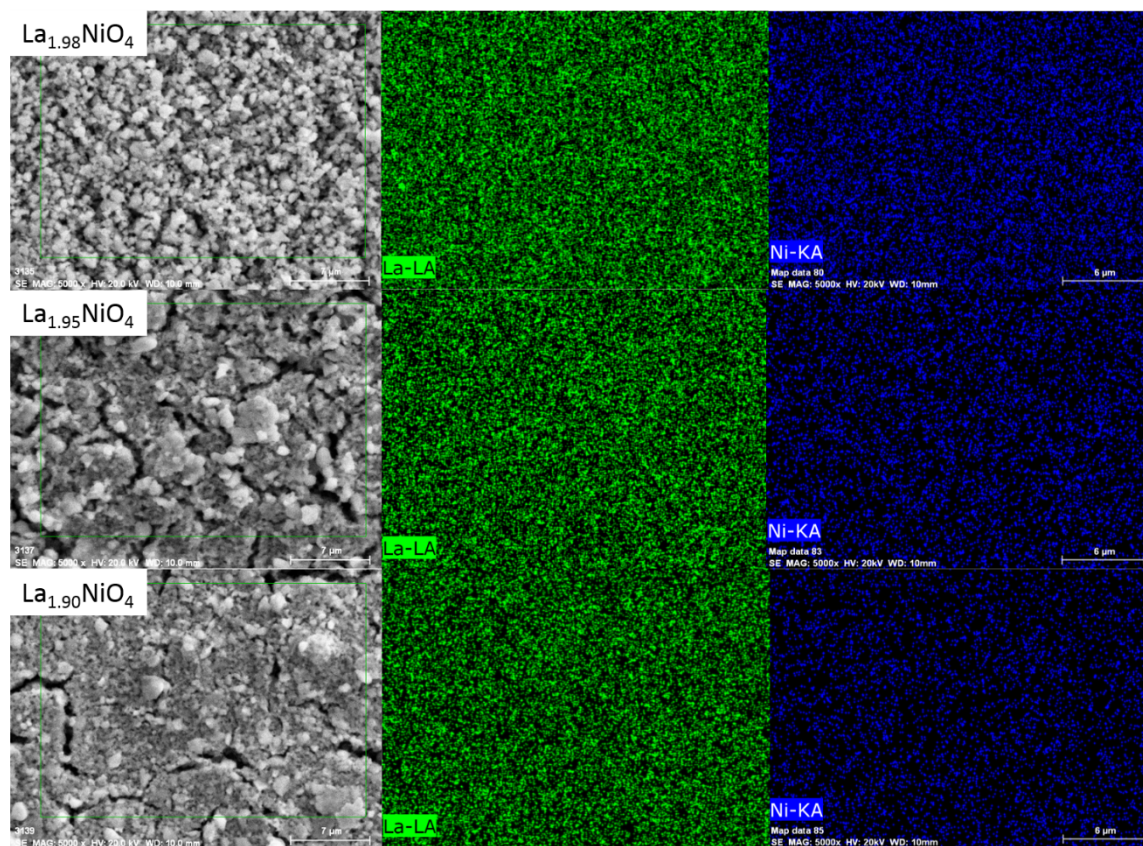

**Figure S8** Situations of elemental distribution of three La-deficient electrodes.

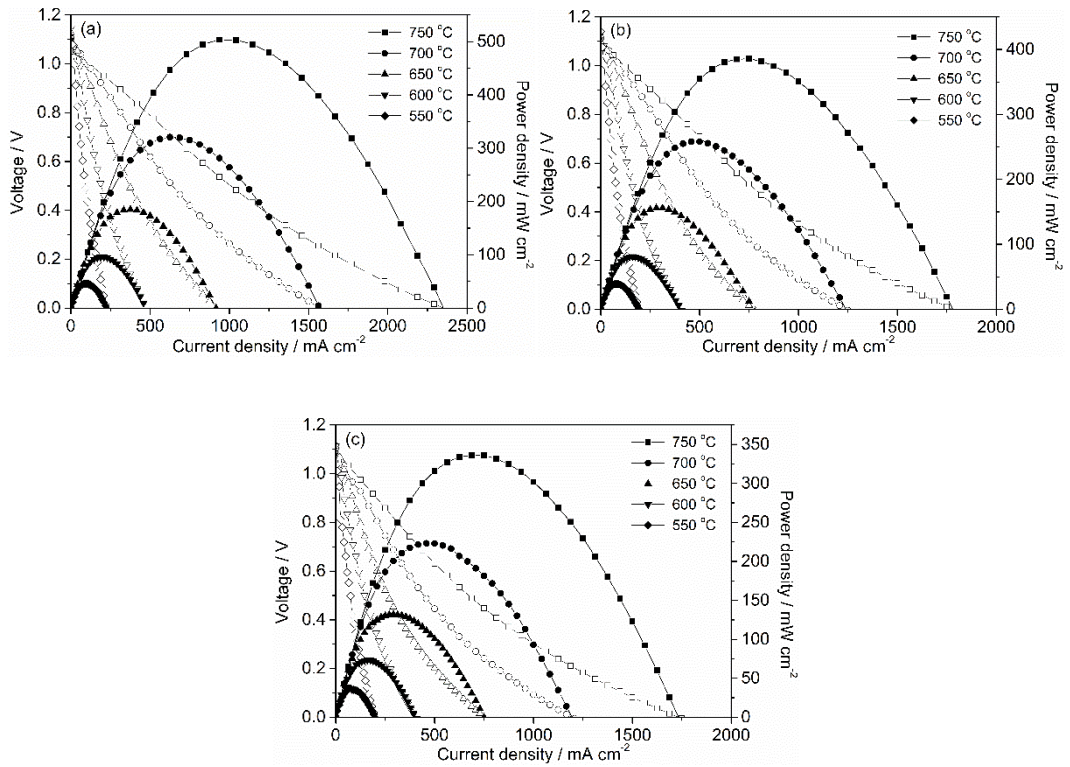

**Figure S9** the  $I$ - $V$  curves of fuel cells with  $\text{La}_{2-x}\text{NiO}_{4+\delta}$  materials as cathodes.
